# Supplementary material
Source: PubMed Central journal article supplement (PMC2666099)
Supplement: NIHMS102987-supplement-1.pdf [file NIHMS102987-supplement-1.pdf]

**Supplementary Table 1** Subgroup analyses of relative risks of cardiovascular events according to caffeinated coffee consumption (1980–2004)

| Variable                        | Cases (n) | Relative risk according to caffeinated coffee consumption (95% CI) <sup>a</sup> |                            |                  |                  |                  | p value for trend | p value for interaction |
|---------------------------------|-----------|---------------------------------------------------------------------------------|----------------------------|------------------|------------------|------------------|-------------------|-------------------------|
|                                 |           | <1 cup/month                                                                    | 1 cup/month to 4 cups/week | 5–7 cups/week    | 2–3 cups/day     | ≥4 cups/day      |                   |                         |
| BMI (kg/m <sup>2</sup> )        |           |                                                                                 |                            |                  |                  |                  |                   |                         |
| <30                             | 371       | 1.0                                                                             | 0.98 (0.69–1.39)           | 0.92 (0.68–1.25) | 0.90 (0.64–1.26) | 0.81 (0.51–1.28) | 0.34              |                         |
| ≥30                             | 287       | 1.0                                                                             | 1.14 (0.76–1.71)           | 1.50 (1.06–2.12) | 1.07 (0.70–1.62) | 0.80 (0.39–1.64) | 0.52              | 0.16                    |
| Smoking                         |           |                                                                                 |                            |                  |                  |                  |                   |                         |
| No                              | 254       | 1.0                                                                             | 1.11 (0.76–1.62)           | 1.03 (0.74–1.45) | 0.75 (0.48–1.16) | 0.54 (0.21–1.37) | 0.04              |                         |
| Yes                             | 383       | 1.0                                                                             | 1.07 (0.72–1.58)           | 1.32 (0.95–1.82) | 1.24 (0.87–1.75) | 1.07 (0.67–1.71) | 0.71              | 0.34                    |
| Alcohol                         |           |                                                                                 |                            |                  |                  |                  |                   |                         |
| Abstainer                       | 284       | 1.0                                                                             | 0.95 (0.65–1.37)           | 1.02 (0.74–1.40) | 0.87 (0.60–1.27) | 0.94 (0.56–1.55) | 0.62              |                         |
| Drinker                         | 374       | 1.0                                                                             | 1.16 (0.78–1.71)           | 1.23 (0.87–1.74) | 0.99 (0.68–1.45) | 0.73 (0.40–1.32) | 0.12              | 0.41                    |
| Parental history of MI          |           |                                                                                 |                            |                  |                  |                  |                   |                         |
| No                              | 493       | 1.0                                                                             | 1.23 (0.90–1.67)           | 1.29 (0.98–1.69) | 1.08 (0.79–1.47) | 0.95 (0.61–1.49) | 0.45              |                         |
| Yes                             | 165       | 1.0                                                                             | 0.65 (0.38–1.12)           | 0.87 (0.56–1.35) | 0.70 (0.42–1.16) | 0.52 (0.23–1.17) | 0.18              | 0.38                    |
| Duration of diabetes            |           |                                                                                 |                            |                  |                  |                  |                   |                         |
| ≤10 years                       | 324       | 1.0                                                                             | 0.85 (0.57–1.26)           | 1.05 (0.76–1.46) | 0.88 (0.60–1.27) | 0.85 (0.48–1.50) | 0.57              |                         |
| >10 years                       | 334       | 1.0                                                                             | 1.31 (0.91–1.88)           | 1.27 (0.92–1.75) | 1.06 (0.73–1.53) | 0.84 (0.50–1.43) | 0.24              | 0.21                    |
| History of hypertension         |           |                                                                                 |                            |                  |                  |                  |                   |                         |
| No                              | 301       | 1.0                                                                             | 1.07 (0.70–1.64)           | 1.21 (0.84–1.73) | 1.21 (0.81–1.79) | 0.97 (0.57–1.67) | 0.93              |                         |
| Yes                             | 357       | 1.0                                                                             | 1.08 (0.76–1.51)           | 1.16 (0.86–1.56) | 0.90 (0.63–1.28) | 0.80 (0.45–1.42) | 0.24              | 0.87                    |
| Insulin use                     |           |                                                                                 |                            |                  |                  |                  |                   |                         |
| No                              | 479       | 1.0                                                                             | 1.06 (0.78–1.44)           | 1.19 (0.92–1.56) | 0.95 (0.70–1.29) | 0.90 (0.58–1.39) | 0.33              |                         |
| Yes                             | 179       | 1.0                                                                             | 1.06 (0.62–1.80)           | 1.14 (0.72–1.81) | 1.16 (0.70–1.94) | 0.76 (0.34–1.69) | 0.47              | 0.68                    |
| Cholesterol-lowering medication |           |                                                                                 |                            |                  |                  |                  |                   |                         |
| No                              | 530       | 1.0                                                                             | 0.98 (0.73–1.32)           | 1.12 (0.87–1.44) | 1.00 (0.75–1.32) | 0.88 (0.58–1.31) | 0.54              |                         |
| Yes                             | 128       | 1.0                                                                             | 1.58 (0.84–2.99)           | 1.58 (0.88–2.86) | 1.05 (0.53–2.10) | 0.73 (0.21–2.66) | 0.28              | 0.75                    |

<sup>a</sup>Adjusted for age (5-year categories), smoking status (never, past or current 1–14, 15–24 or ≥25 cigarettes/day), BMI (<23.0, 23.0–24.9, 25.0–27.9, 28.0–29.9 or ≥30.0 kg/m<sup>2</sup>), alcohol intake (0, 0.1–4.9, 5–14 or ≥15 g/day), parental history of MI, history of hypertension, hypercholesterolemia, menopausal status and use of hormone therapy, physical activities (<1, 1–1.9, 2–3.9, 4–6.9 or ≥7 h/week), multivitamin use and vitamin E supplement use, total energy intake, duration of diabetes (<5, 5–10, 11–15 or ≥15 years) and hypoglycaemic medication, except for the stratification variable

**Supplementary Table 2** Relative risks (95% CI) of cardiovascular diseases and all-cause mortality associated with decaffeinated coffee and tea consumption in women with type 2 diabetes

|                                         | <b>Beverage consumption (cups)</b> |                              |                  |                  | <b><i>p</i> value<br/>for trend</b> |
|-----------------------------------------|------------------------------------|------------------------------|------------------|------------------|-------------------------------------|
|                                         | <b>&lt;1/month</b>                 | <b>1/month to<br/>4/week</b> | <b>5–7/week</b>  | <b>≥2/day</b>    |                                     |
| <b>Decaffeinated coffee<sup>a</sup></b> |                                    |                              |                  |                  |                                     |
| Total cardiovascular diseases           |                                    |                              |                  |                  |                                     |
| Person years                            | 17,408                             | 15,002                       | 11,784           | 3,728            |                                     |
| Cases ( <i>n</i> )                      | 176                                | 153                          | 136              | 38               |                                     |
| Age- and smoking-adjusted               | 1.0                                | 0.94 (0.76–1.17)             | 1.00 (0.80–1.26) | 0.96 (0.68–1.37) | 0.95                                |
| Multivariable I <sup>b</sup>            | 1.0                                | 0.93 (0.74–1.16)             | 0.95 (0.75–1.20) | 0.96 (0.67–1.39) | 0.85                                |
| Multivariable II <sup>c</sup>           | 1.0                                | 0.93 (0.74–1.17)             | 0.94 (0.74–1.19) | 0.96 (0.66–1.38) | 0.84                                |
| All-cause mortality                     |                                    |                              |                  |                  |                                     |
| Person-years                            | 17,525                             | 15,106                       | 11,867           | 3,751            |                                     |
| Deaths ( <i>n</i> )                     | 227                                | 163                          | 138              | 43               |                                     |
| Age- and smoking-adjusted               | 1.0                                | 0.75 (0.61–0.91)             | 0.76 (0.62–0.94) | 0.82 (0.59–1.14) | 0.23                                |
| Multivariable I <sup>b</sup>            | 1.0                                | 0.78 (0.63–0.97)             | 0.77 (0.61–0.96) | 0.76 (0.54–1.07) | 0.13                                |
| Multivariable II <sup>c</sup>           | 1.0                                | 0.80 (0.65–0.99)             | 0.75 (0.59–0.94) | 0.76 (0.54–1.07) | 0.08                                |
| <b>Tea<sup>d</sup></b>                  |                                    |                              |                  |                  |                                     |
| Total cardiovascular diseases           |                                    |                              |                  |                  |                                     |
| Person-years                            | 13,076                             | 27,178                       | 16,841           | 5,628            |                                     |
| Cases ( <i>n</i> )                      | 118                                | 294                          | 193              | 53               |                                     |
| Age- and smoking-adjusted               | 1.0                                | 1.12 (0.91–1.39)             | 1.25 (1.00–1.58) | 1.32 (0.95–1.83) | 0.06                                |
| Multivariable I <sup>b</sup>            | 1.0                                | 1.17 (0.94–1.46)             | 1.24 (0.98–1.57) | 1.33 (0.95–1.85) | 0.13                                |
| Multivariable II <sup>c</sup>           | 1.0                                | 1.15 (0.92–1.43)             | 1.16 (0.90–1.48) | 1.16 (0.79–1.69) | 0.61                                |
| All-cause mortality                     |                                    |                              |                  |                  |                                     |
| Person years                            | 13,152                             | 27,353                       | 16,952           | 5,669            |                                     |
| Deaths ( <i>n</i> )                     | 164                                | 315                          | 199              | 56               |                                     |
| Age- and smoking-adjusted               | 1.0                                | 0.86 (0.71–1.04)             | 0.94 (0.76–1.15) | 1.03 (0.76–1.40) | 0.41                                |
| Multivariable I <sup>b</sup>            | 1.0                                | 0.96 (0.79–1.16)             | 1.00 (0.81–1.24) | 1.03 (0.75–1.40) | 0.68                                |
| Multivariable II <sup>c</sup>           | 1.0                                | 0.97 (0.80–1.18)             | 1.00 (0.81–1.23) | 1.00 (0.73–1.36) | 0.88                                |

<sup>a</sup>Follow-up from 1984

<sup>b</sup>Covariates included in the multivariable models are the same as those listed in the footnotes to Table 2

<sup>c</sup>Covariates included in the multivariable models are the same as those listed in the footnotes to Table 2 and are additionally adjusted for coffee consumption

<sup>d</sup>Follow-up from 1980
